# Supplementary material for: NMR, DFT and luminescence studies of the complexation of Zn(ii) with 8-hydroxyquinoline-5-sulfonate
Source: Royal Society of Chemistry journal article supplement (doi:10.1039/c1dt10978b), 2011-01-01
Supplement: c1dt10978b.pdf [file c1dt10978b.pdf]

## Electronic Supplementary Information

### NMR, DFT and Luminescence Studies of the Complexation of Zn(II) with 8-Hydroxyquinoline-5-sulfonate

M. Luísa Ramos, Licinia L. G. Justino, Adriana Branco, Cláudia M. G. Duarte, Paulo E. Abreu, Sofia M. Fonseca, Hugh D. Burrows

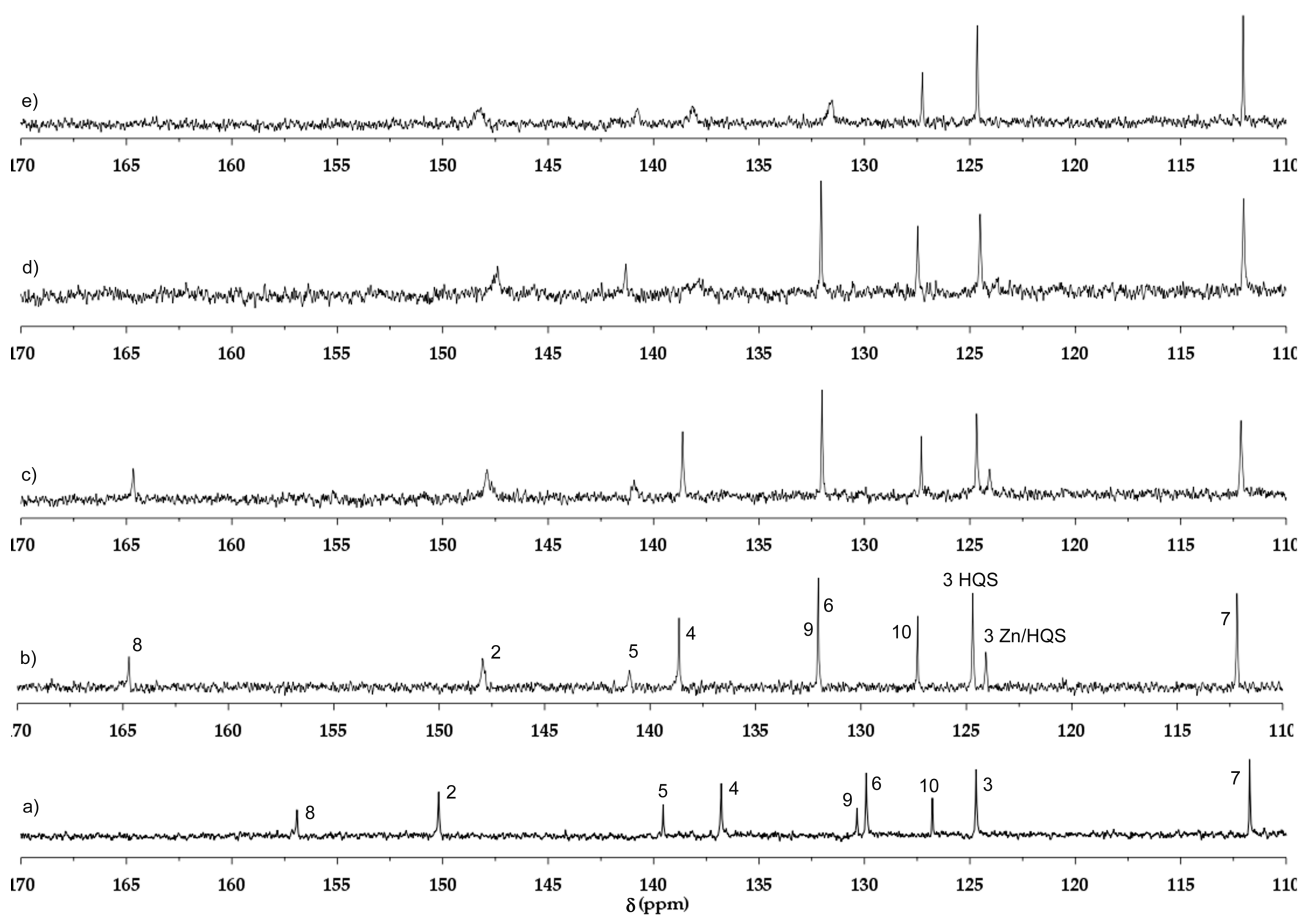

$^{13}\text{C}$  NMR spectra of  $\text{D}_2\text{O}$  solutions of a) HQS  $10 \text{ mmol dm}^{-3}$ , pH 6.5; b) Zn/HQS  $10:10 \text{ mmol dm}^{-3}$ , pH 5.6; c) Zn/HQS  $5:10 \text{ mmol dm}^{-3}$ , pH 7.6; d) Zn/HQS  $3.3:10 \text{ mmol dm}^{-3}$ , pH 6.7; e) Zn/HQS  $2.5:10 \text{ mmol dm}^{-3}$ , pH 5.9.
